# Supplementary material for: Low-Dose Cardiac Exposure (Heart V5) as an Independent Predictor of Radiation-Induced Pericarditis in Breast Cancer: An Interpretable Machine Learning Study
Source: Research Square preprint supplement (doi:10.21203/rs.3.rs-8105555/v1), 2025-12-22
Supplement: Supplementary file 1 [file e9e23dccc23ac354ccee51a3.docx]

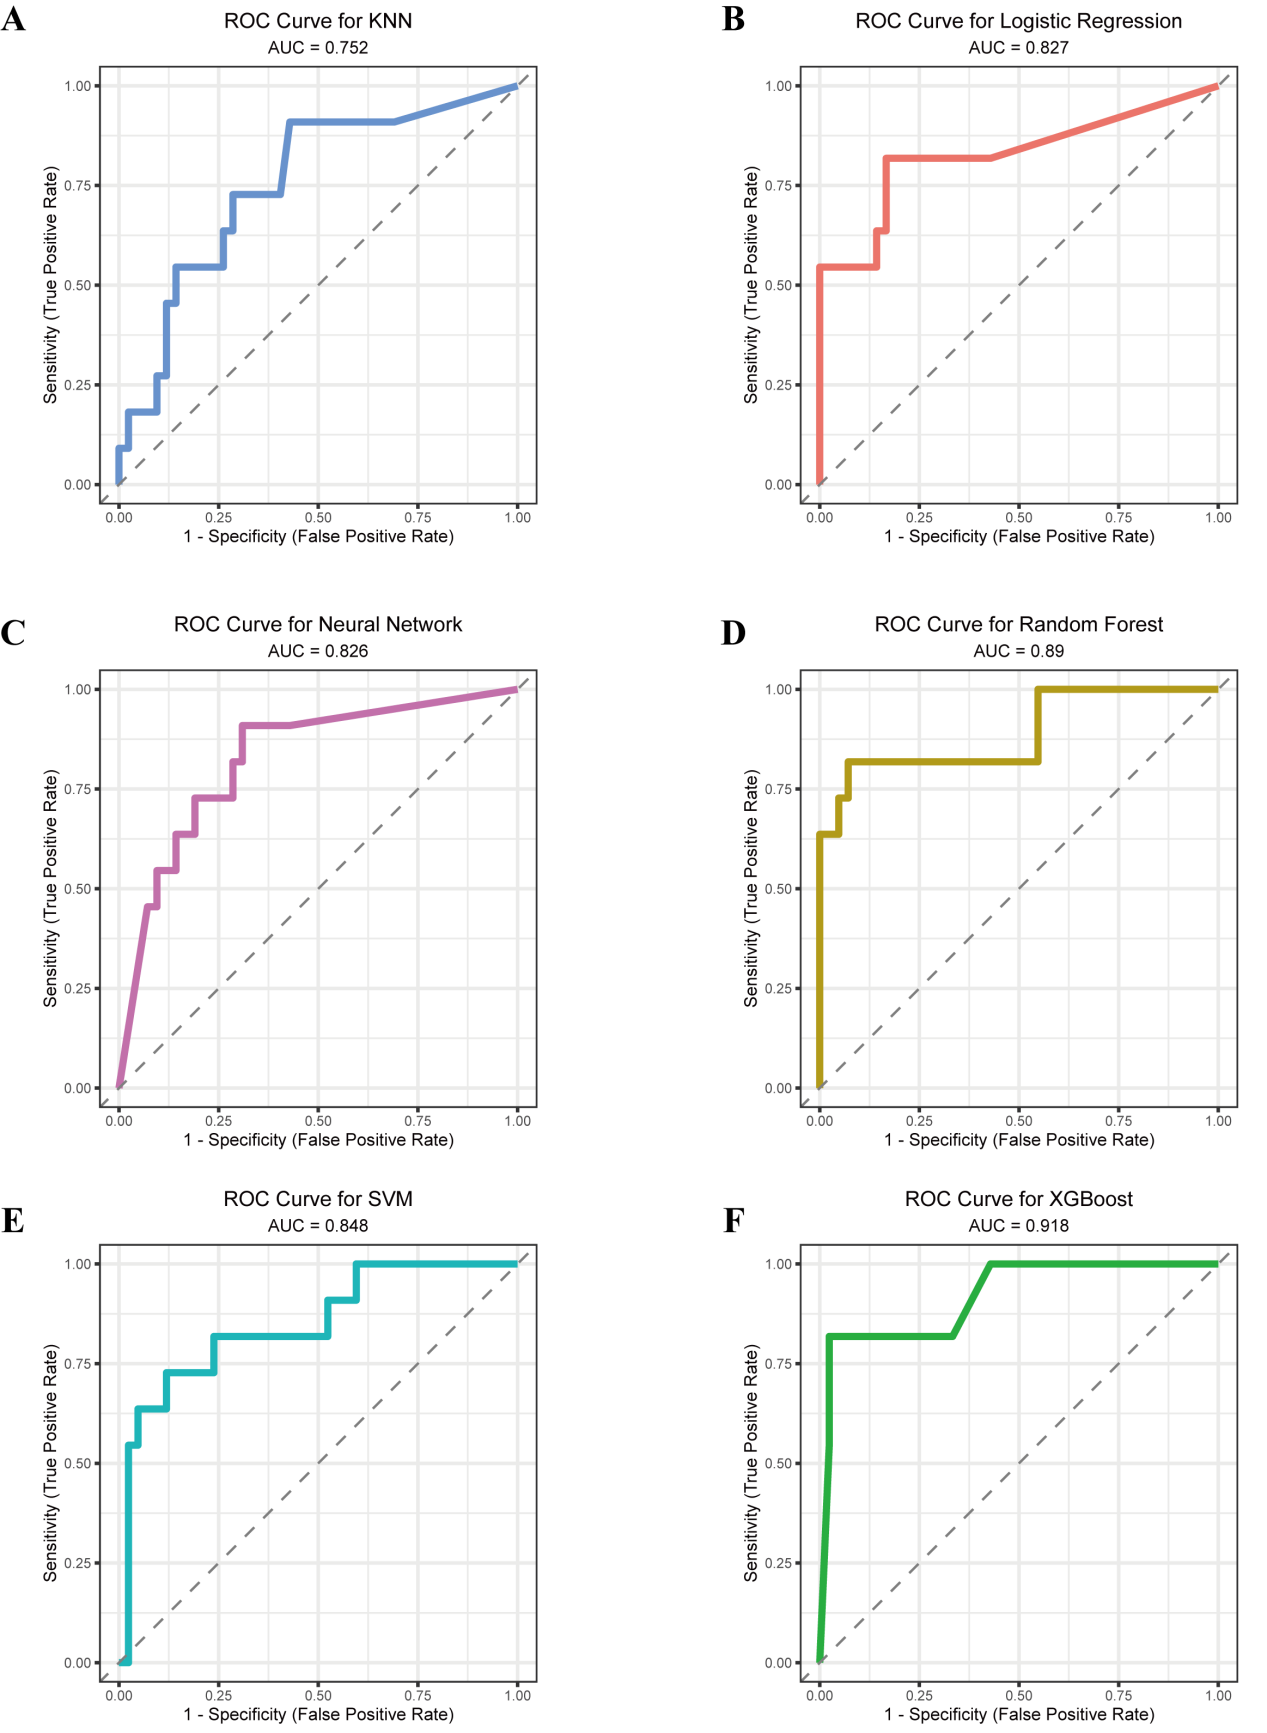
**Supplementary Figure 1.** Individual receiver operating characteristic (ROC) curves for each model on the independent test set (n = 53). Panels A–F correspond to KNN, Logistic Regression, Multilayer Perceptron (Neural Network), Random Forest, SVM and XGBoost, respectively. AUC values are shown on each panel.
